# Supplementary material for: A study of micromanufacturing process fingerprints in micro-injection moulding for machine learning and Industry 4.0 applications
Source: Springer Nature journal article supplement (doi:10.1007/s00170-021-07252-7), 2021-05-19
Supplement: MOESM1 [file 19178672]

```
In [25]: import numpy as np
import matplotlib.pyplot as plt
import pandas as pd
import seaborn as sns
%matplotlib inline
#Here the necessary libraries and functions are imported
```

```
In [26]: data = pd.read_csv('C:/Users/mertg/OneDrive/Desktop/4th_manuscript/data_ana
lysis/python/data/data.csv')
x = data.iloc[:, :-1].values
y = data.iloc[:, 3].values
data.head(10)
#This part of the code assigns different channels of data to specific colum
ns, including the microreplication efficiency (mue).
```

Out[26]:

|   | Pimax      | dP/dt       | d1.5      | mue     |
|---|------------|-------------|-----------|---------|
| 0 | 1029.14145 | 13716.86400 | 283.70188 | 0.71144 |
| 1 | 1011.58963 | 12129.46880 | 266.31811 | 0.69195 |
| 2 | 1024.95704 | 14072.60865 | 275.59651 | 0.70282 |
| 3 | 1047.56080 | 9047.76415  | 257.55696 | 0.70197 |
| 4 | 1015.72145 | 10434.27874 | 263.22405 | 0.69816 |
| 5 | 1023.01310 | 12048.50120 | 264.40052 | 0.70279 |
| 6 | 1057.52670 | 9827.04555  | 253.96898 | 0.70535 |
| 7 | 1024.95704 | 14133.32800 | 270.47897 | 0.70906 |
| 8 | 963.95106  | 10216.67752 | 287.49294 | 0.68750 |
| 9 | 1045.13050 | 13966.33946 | 265.53168 | 0.69527 |

```
In [27]: sns.heatmap(data.corr())
#This is a graphical representation of the correlations between the column
values, as an intermediate step. This gives a rough idea to the user regard
ing the relationships between the columns.
```

```
Out[27]: <matplotlib.axes._subplots.AxesSubplot at 0x27ccb209f70>
```

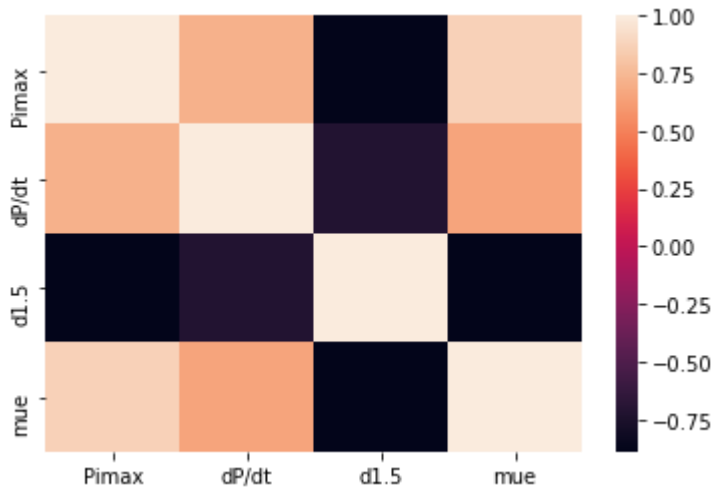

```
In [28]: from sklearn.model_selection import train_test_split
x_train, x_test, y_train, y_test = train_test_split(x,y, test_size = 0.2, r
andom_state = 0)
#This code splits the process fingerprints and the microreplication efficie
ncy into test and training sets. A test size of 0.2 has been used. Random s
tate = 0 denotes that the selections are randomised.
```

```
In [29]: from sklearn.linear_model import LinearRegression
regressor = LinearRegression()
regressor.fit(x_train, y_train)
#Here, the regression model is formed.
```

```
Out[29]: LinearRegression()
```

```
In [30]: y_pred = regressor.predict(x_test)
print(y_pred)
#This prints the predicted y (microreplication efficiency) values are provi
ded.
```

```
[0.72495623 0.71440293 0.72207568 0.71611538 0.70730036 0.69704735
0.7099012 0.74023935 0.72799826 0.72313149 0.69782908 0.70445839]
```

```
In [31]: print(regressor.coef_)
#Slope values are calculated for the multiple linear regression equation/mo
del.
```

```
[ 1.35612504e-04 -2.29209446e-07 -9.70099731e-05]
```

```
In [32]: print(regressor.intercept_)
#Intercept of the equation.
```

```
0.5880115460043237
```

```
In [33]: print(y_test)
         #Selected test values. Note that these are real measurements.
```

```
[0.72103 0.71601 0.73739 0.71138 0.70827 0.70282 0.70584 0.75725 0.73407
 0.71738 0.69816 0.70708]
```

```
In [34]: print(y_pred)
         #Predicted values from the model.
```

```
[0.72495623 0.71440293 0.72207568 0.71611538 0.70730036 0.69704735
 0.7099012 0.74023935 0.72799826 0.72313149 0.69782908 0.70445839]
```
